# Supplementary material for: FastCTM (v1.0): Atmospheric chemical transport modelling with a principle-informed neural network for air quality simulations
Source: Copernicus journal article supplement (doi:10.5194/gmd-18-6295-2025), 2025-09-25
Supplement: Supplementary file 1 [file gmd-18-6295-2025-supplement.pdf]

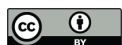

*Supplement of*

**FastCTM (v1.0): Atmospheric chemical transport modelling with a principle-informed neural network for air quality simulations**

**Baolei Lyu et al.**

*Correspondence to:* Baolei Lyu (baoleily@foxmail.com) and Ran Huang (ranhuang2019@163.com)

The copyright of individual parts of the supplement might differ from the article licence.

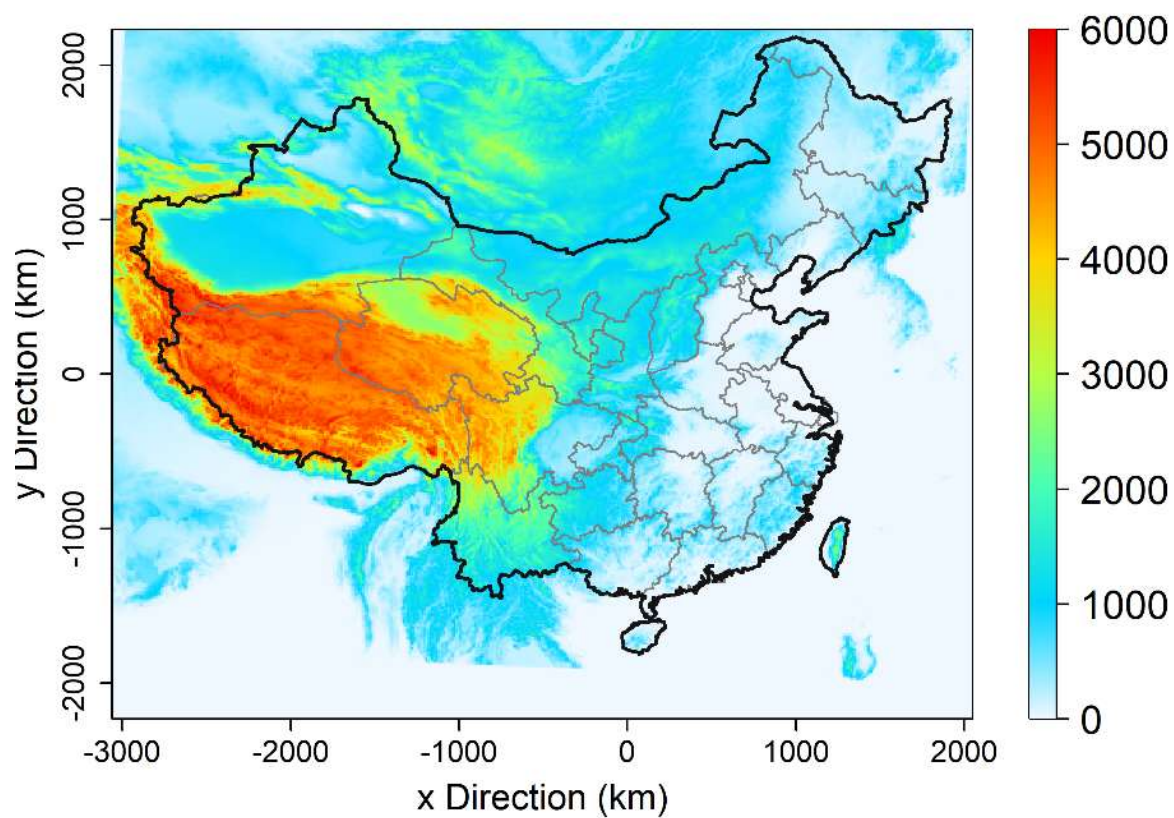

**Figure S1:** The spatial coverage for CMAQ simulation in 12-km resolution. The colour in this figure represent elevations above sea level.

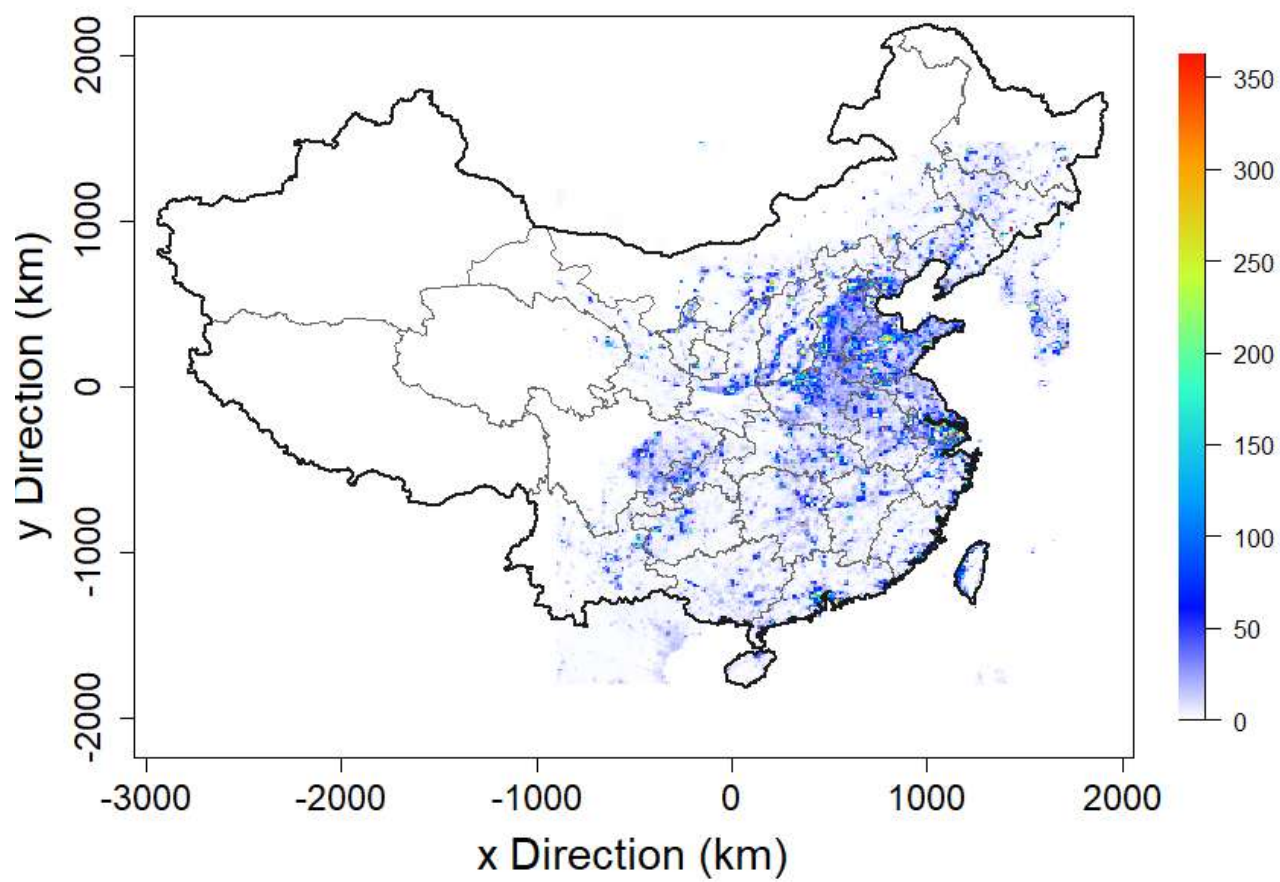

Figure S2: Annual average emissions (g/s) of NO<sub>x</sub> used in this study.

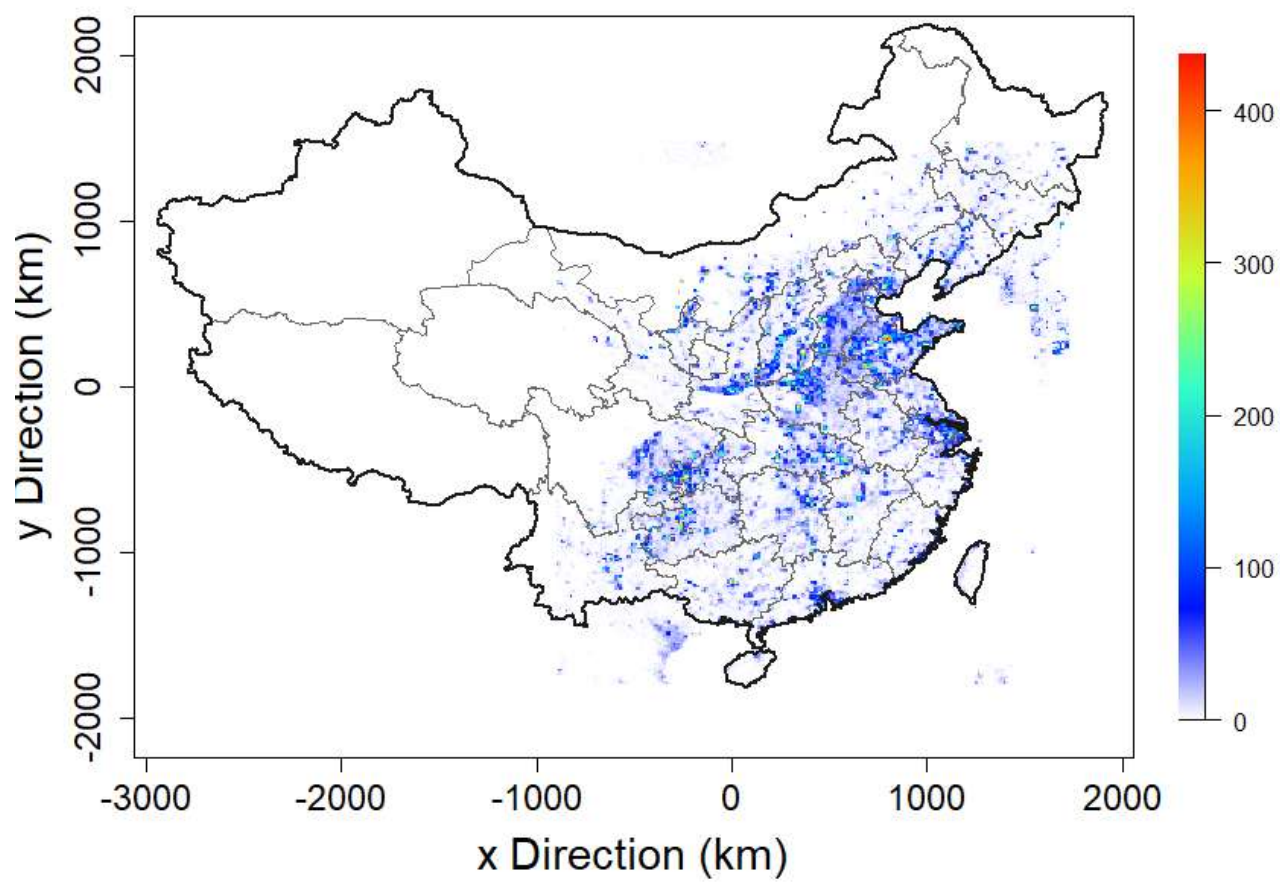

Figure S3: Annual average emissions (g/s) of SO<sub>2</sub> used in this study.



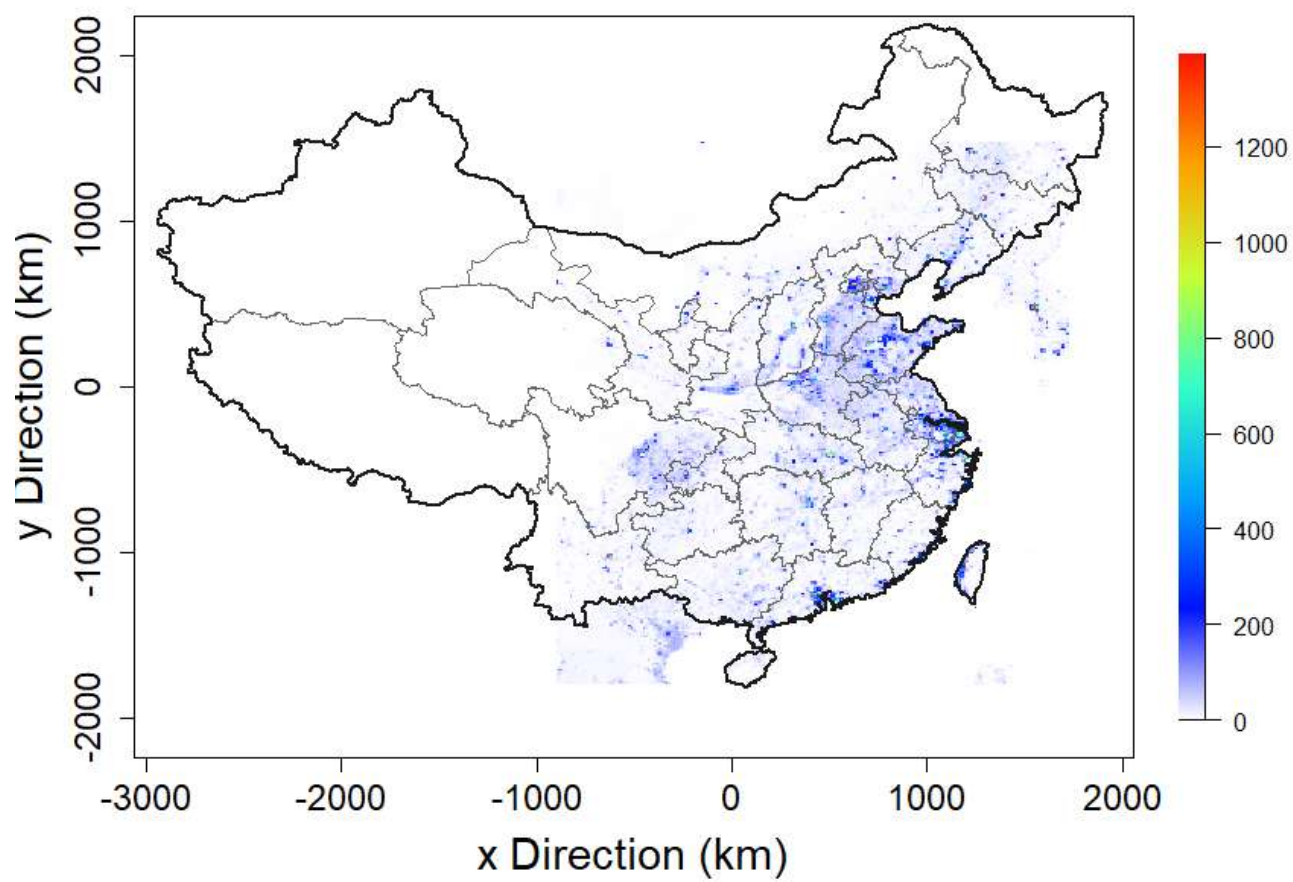

Figure S4: Annual average emissions (g/s) of VOC used in this study.

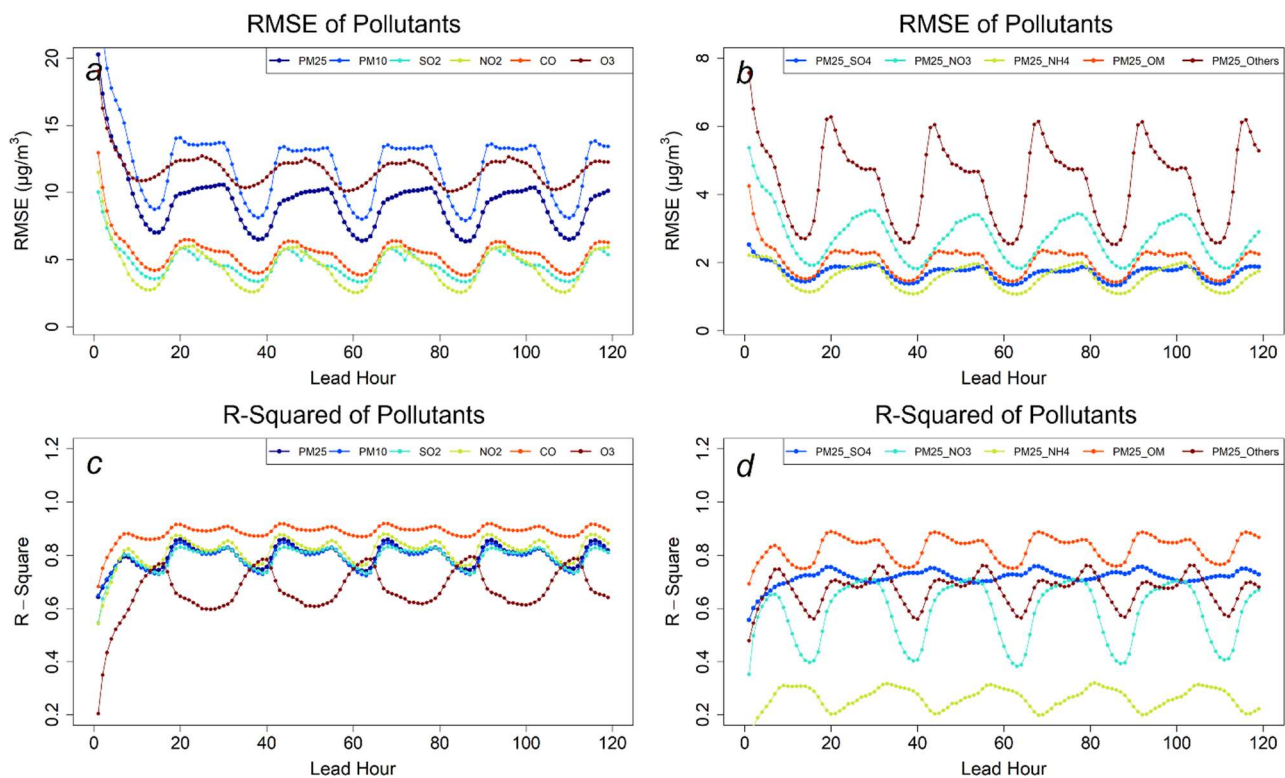

**Figure S5: The evaluation metrics of RMSE and  $R^2$  for air pollutants' concentration forecasts with the FASTCTM model initialized with fields in zero values.**

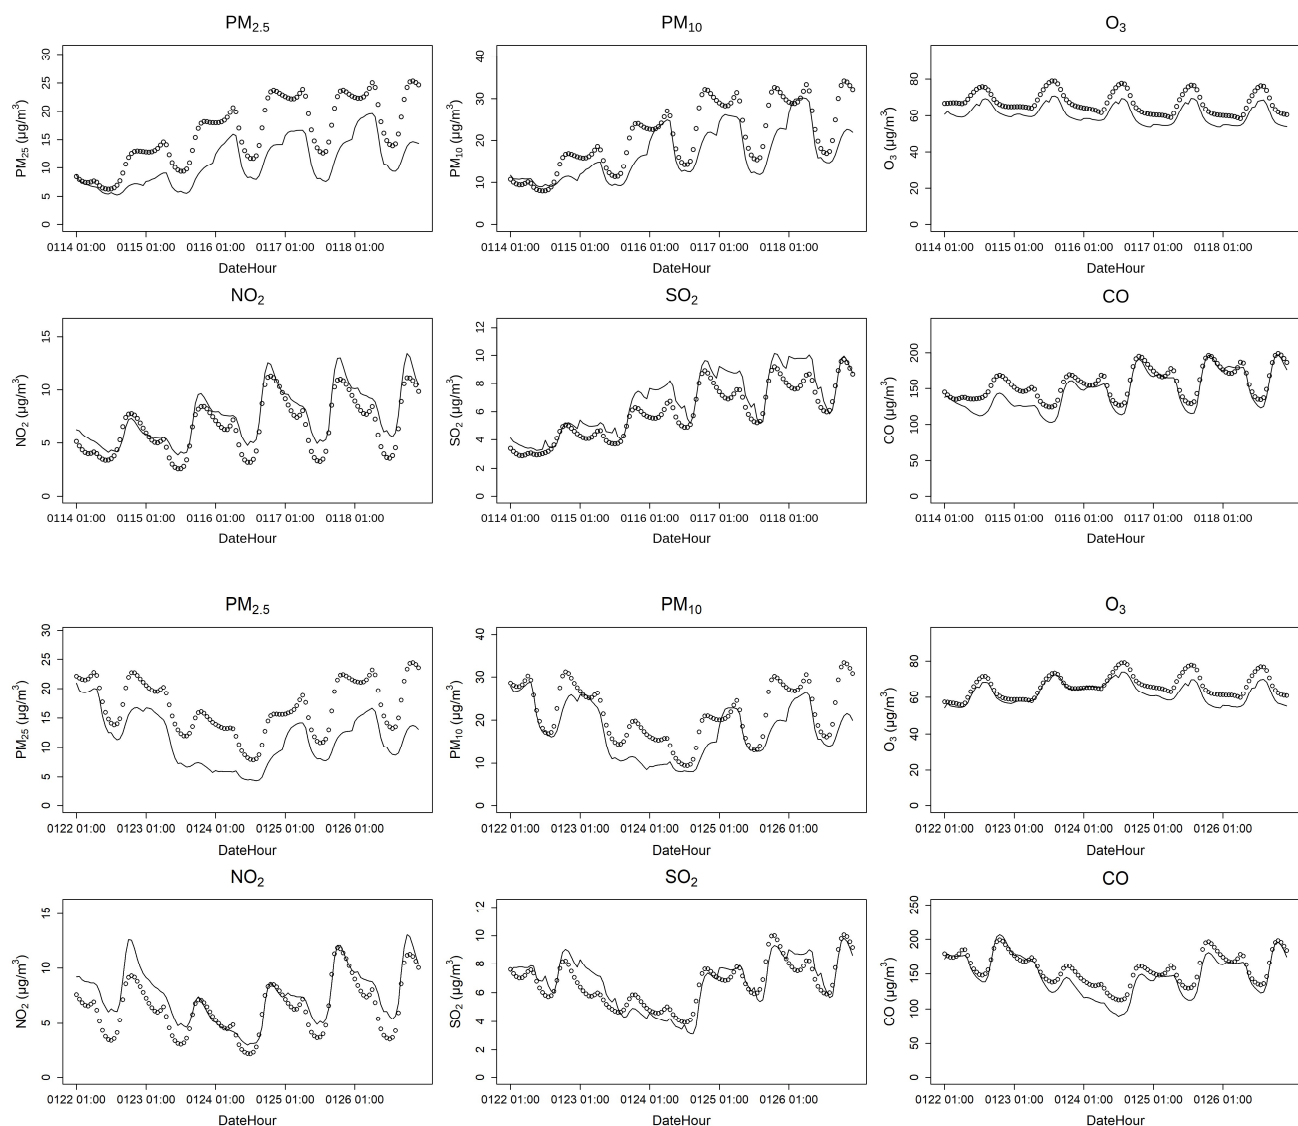

**Figure S6: Time series of hourly air pollutant concentrations averaged for all China with the circles represent CMAQ forecasts and the solid black lines represent FastCTM forecasts: prediction cycle starting on January 14, 2023 (top) versus prediction cycle starting on January 22, 2023 (bottom).**

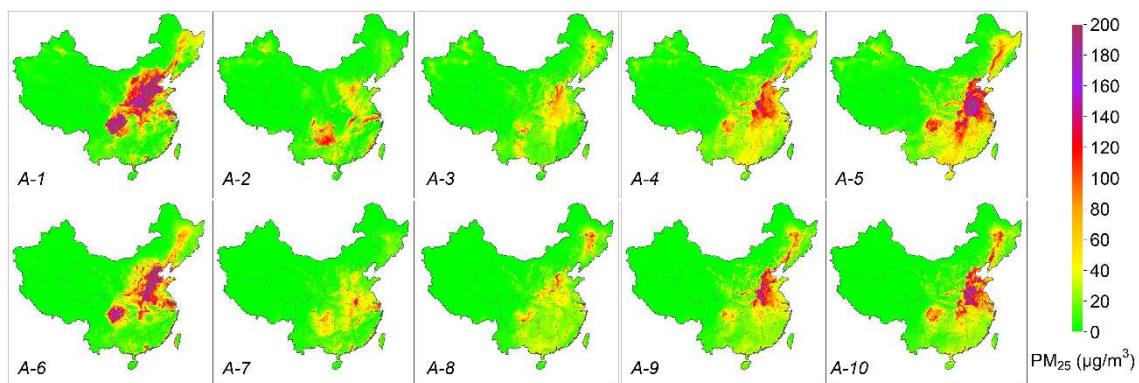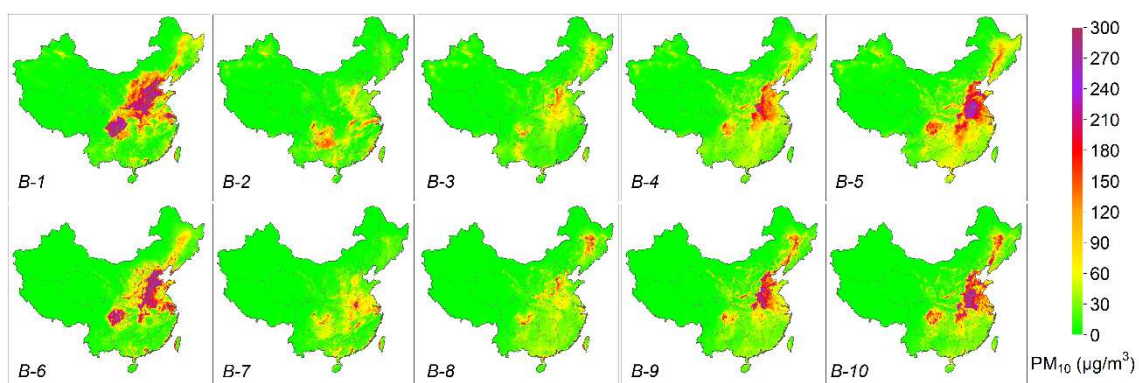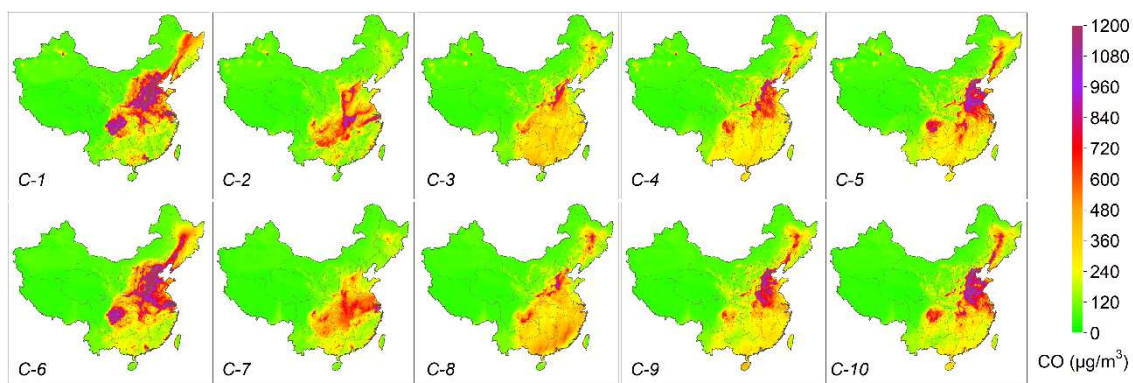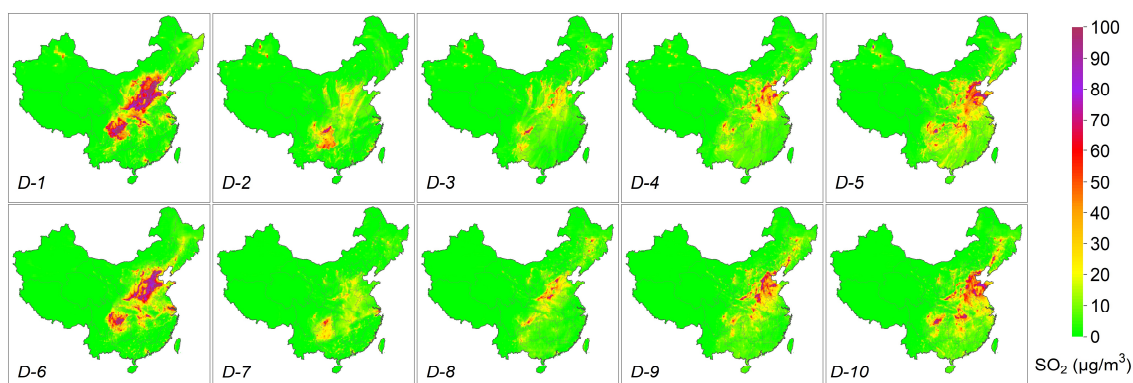



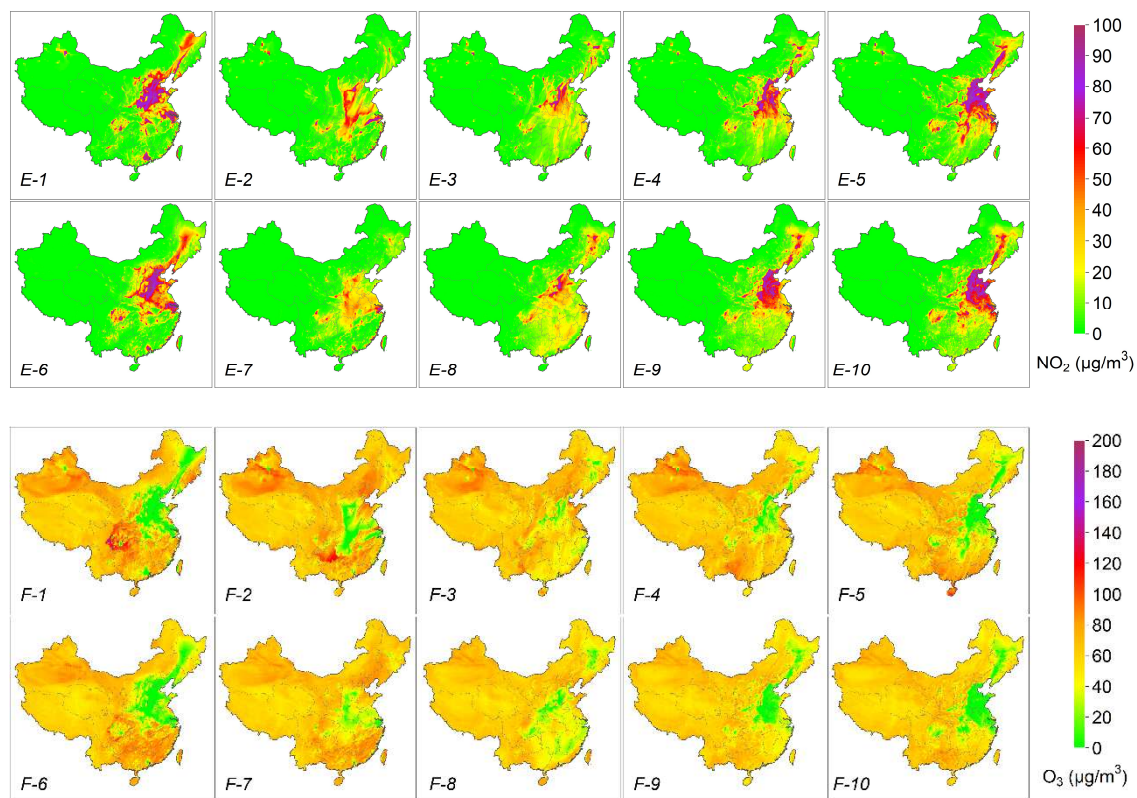

**Figure S7: Air quality forecast examples of CMAQ and FastCTM at leading time of 24, 48, 72, 94 and 120 hours starting from 0:00 on March 4<sup>th</sup>, 2023. Panel A-F respectively refers to PM<sub>2.5</sub>, PM<sub>10</sub>, CO, SO<sub>2</sub>, NO<sub>2</sub> and O<sub>3</sub>. The 1-5 sub-panels in the first row (1-5) in each panel are the CMAQ forecasts, while the 6-10 sub-panels in the second row are FastCTM forecasts.**

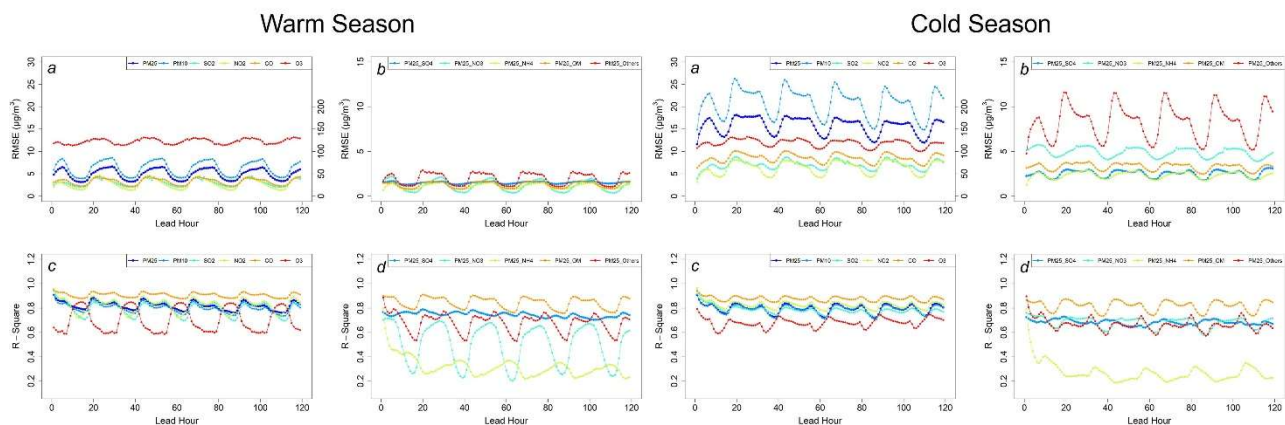

**Figure S8: The evaluation performances of random forest forecasts against CMAQ forecasts in warm season of 2023. Panel (a) and (b) respectively show RMSE values of criteria pollutants and the PM<sub>2.5</sub> components of. Panel (c) and (d) respectively show R<sup>2</sup> values. It should be noted that RMSE value of CO corresponds to the right axis in panel (a).**



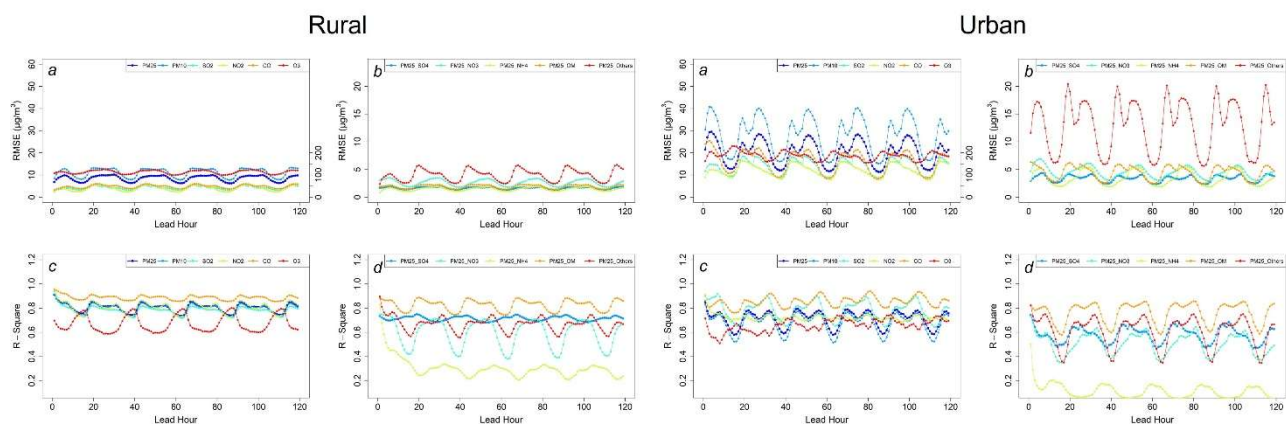

**Figure S9: The evaluation performances of FastCTM forecasts against CMAQ forecasts in rural and urban areas in 2023. Panel (a) and (b) respectively show RMSE values of criteria pollutants and the PM<sub>2.5</sub> components of. Panel (c) and (d) respectively show R<sup>2</sup> values. It should be noted that RMSE value of CO corresponds to the right axis in panel (a).**

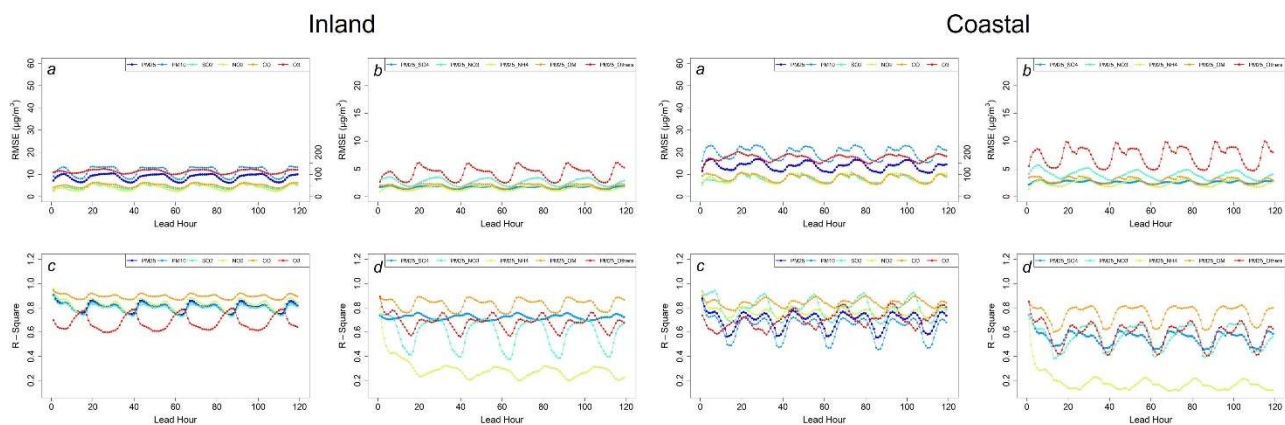

**Figure S10: The evaluation performances of FastCTM forecasts against CMAQ forecasts in inland and coastal areas in 2023. Panel (a) and (b) respectively show RMSE values of criteria pollutants and the PM<sub>2.5</sub> components of. Panel (c) and (d) respectively show R<sup>2</sup> values. It should be noted that RMSE value of CO corresponds to the right axis in panel (a)**

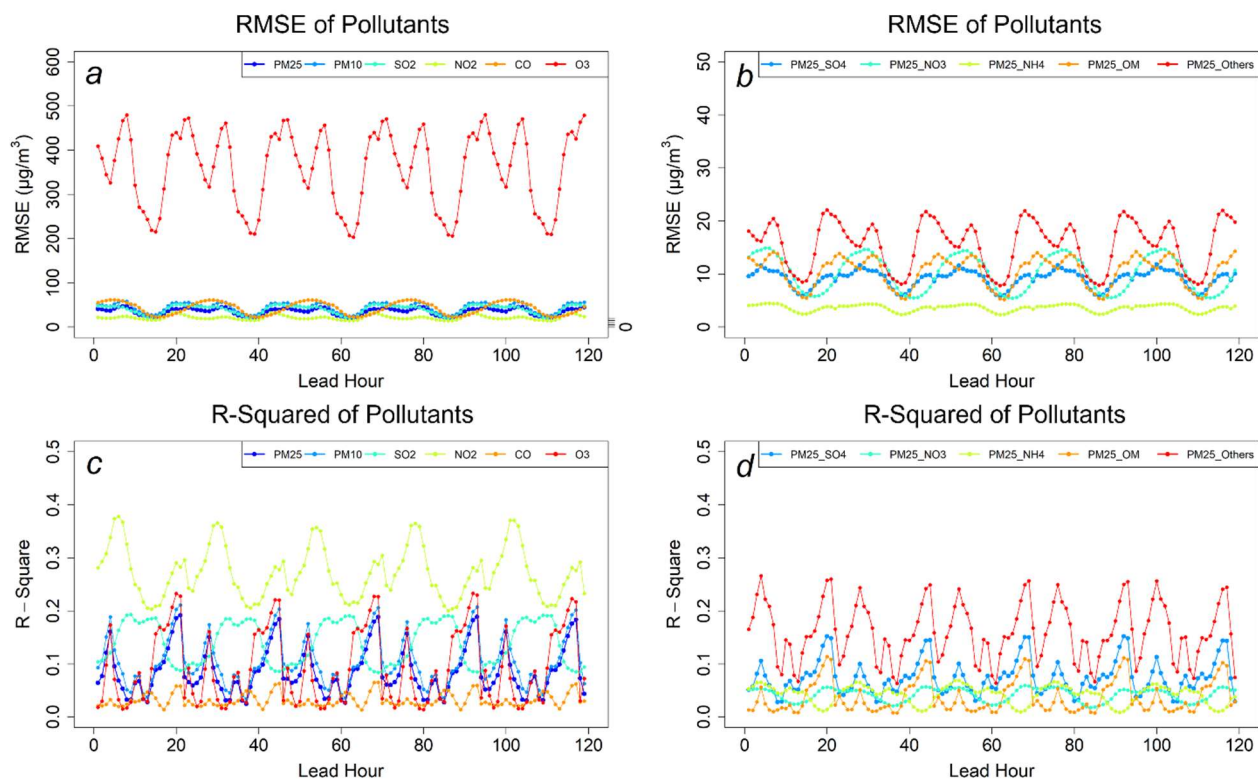

**Figure S11: The evaluation performances of linear regression forecasts against CMAQ forecasts in 2023. Panel (a) and (b) respectively show RMSE values of criteria pollutants and the PM<sub>2.5</sub> components of. Panel (c) and (d) respectively show R<sup>2</sup> values. It should be noted that RMSE value of CO corresponds to the right axis in panel (a).**

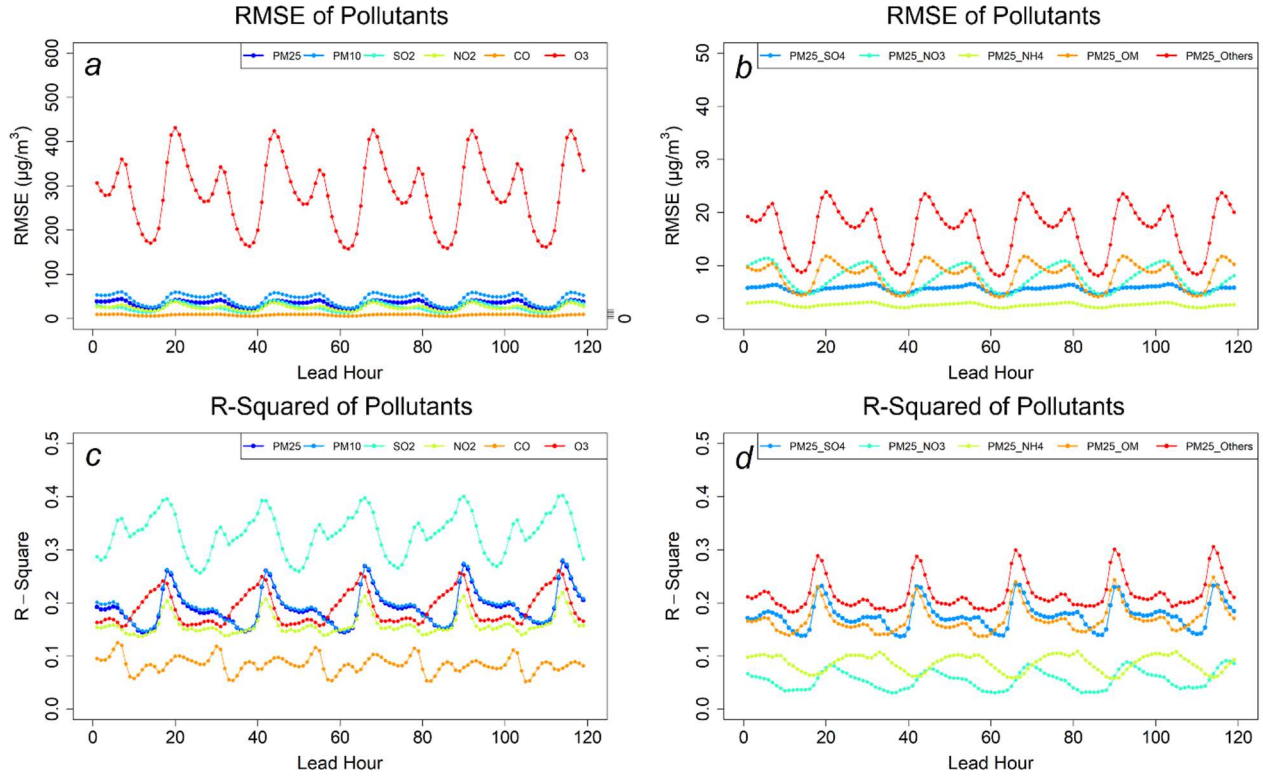

**Figure S12: The evaluation performances of random forest forecasts against CMAQ forecasts in 2023. Panel (a) and (b) respectively show RMSE values of criteria pollutants and the PM<sub>2.5</sub> components of. Panel (c) and (d) respectively show R<sup>2</sup> values. It should be noted that RMSE value of CO corresponds to the right axis in panel (a).**

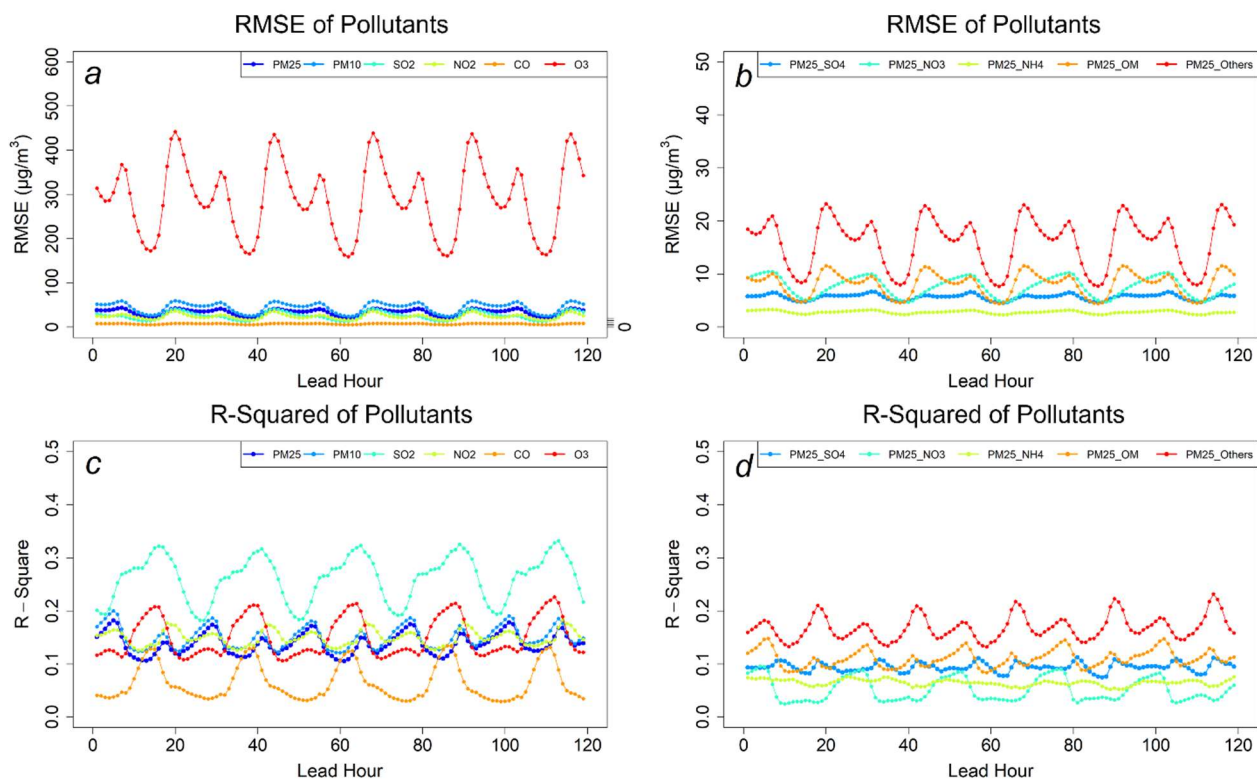

**Figure S13: The evaluation performances of XGBoost forecasts against CMAQ forecasts in 2023. Panel (a) and (b) respectively show RMSE values of criteria pollutants and the PM<sub>2.5</sub> components of. Panel (c) and (d) respectively show R<sup>2</sup> values. It should be noted that RMSE value of CO corresponds to the right axis in panel (a).**

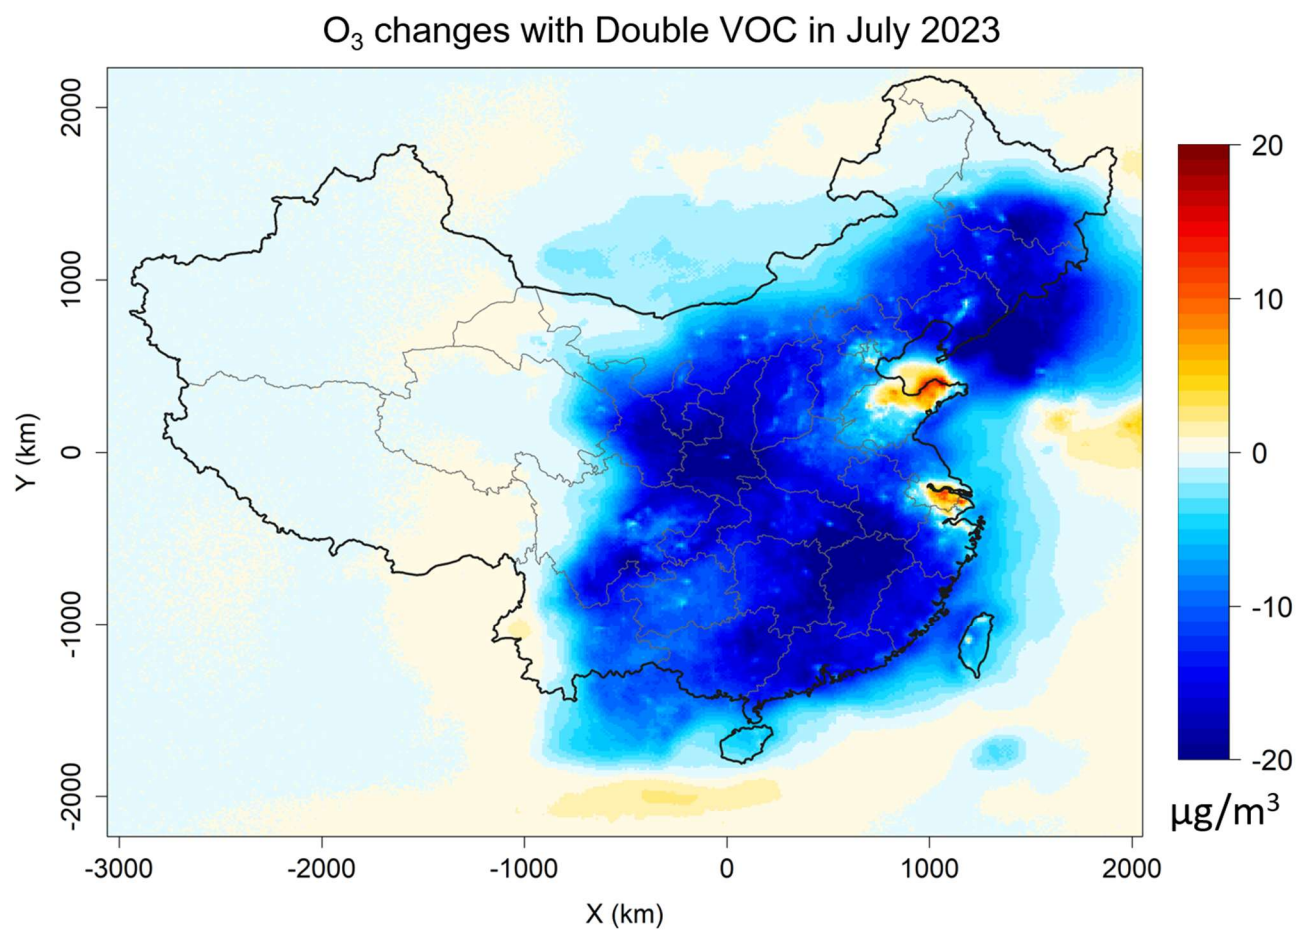

Figure S14: Predicted average changes of hourly O<sub>3</sub> concentrations in 5 lead-days with doubled VOC emissions in July 2023.



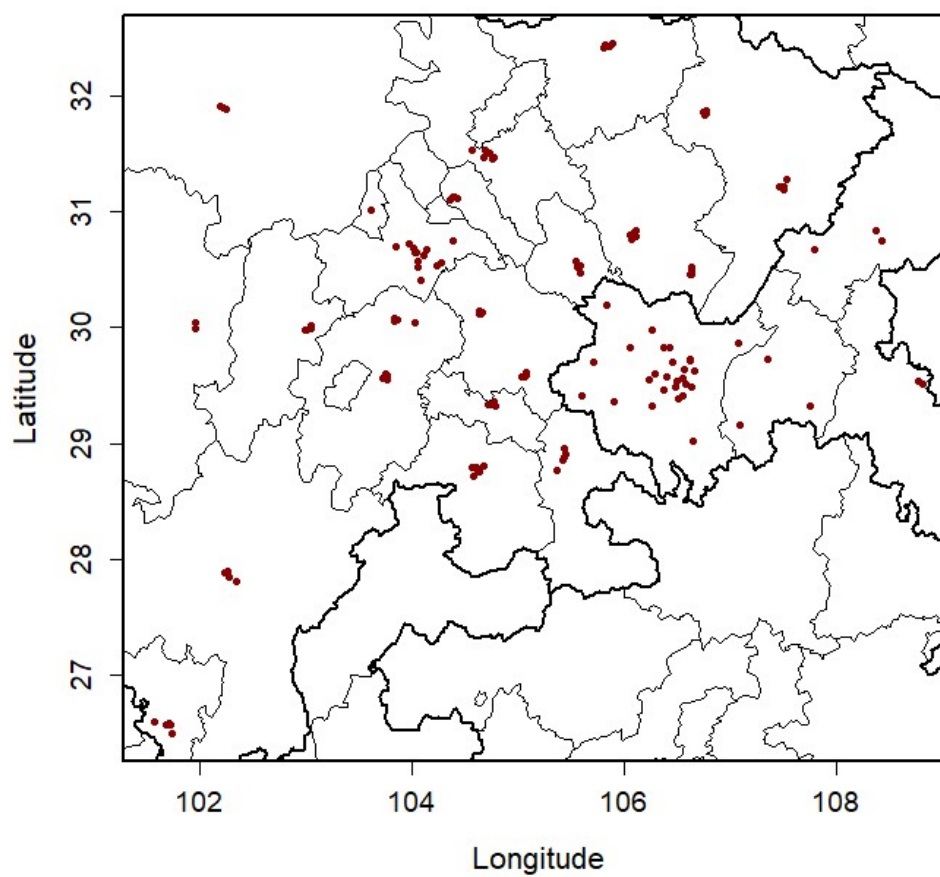

**Figure S15:** The locations of national air quality monitors used for evaluation FastCTM responses to emission changes.

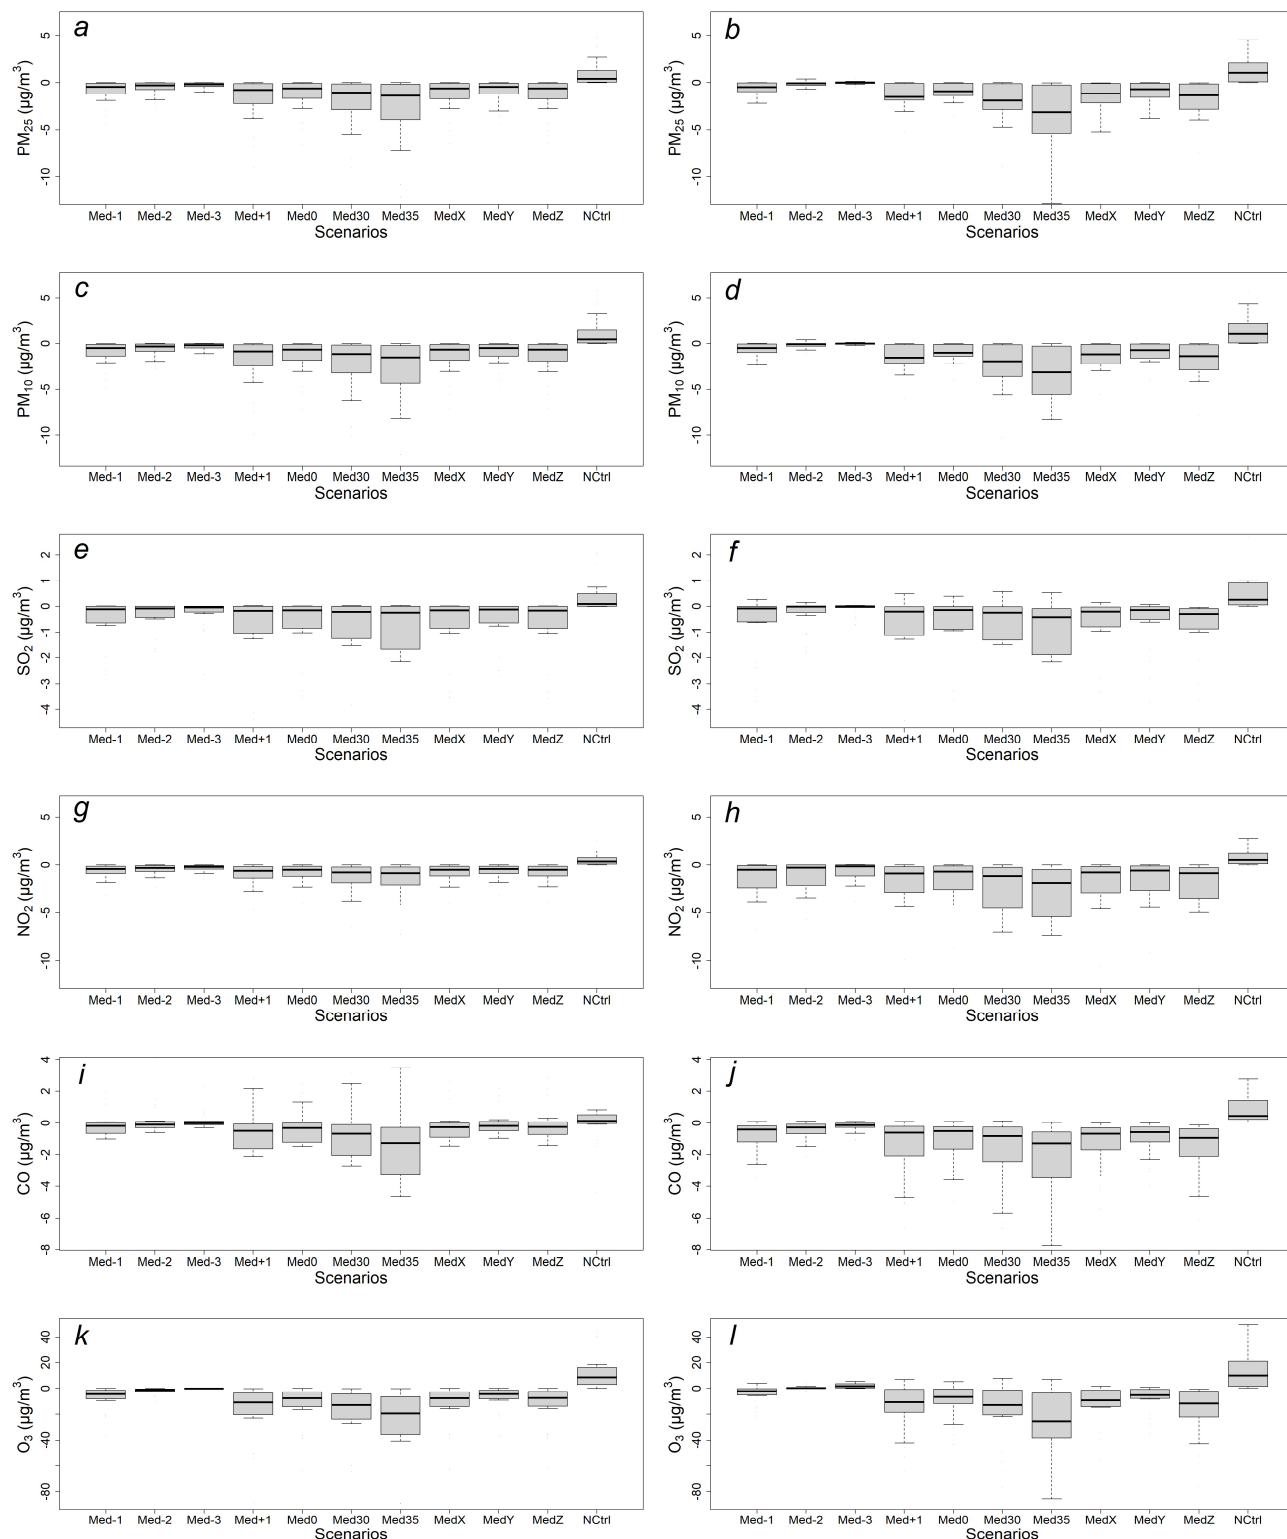

**Figure S16: Air pollutant concentration changes in terms of base case simulated by CMAQ (subplots of a, c, e, g, i and k in first column) and by FastCTM (subplots of b, d, f, h, j and l in second column) in January 2019.**

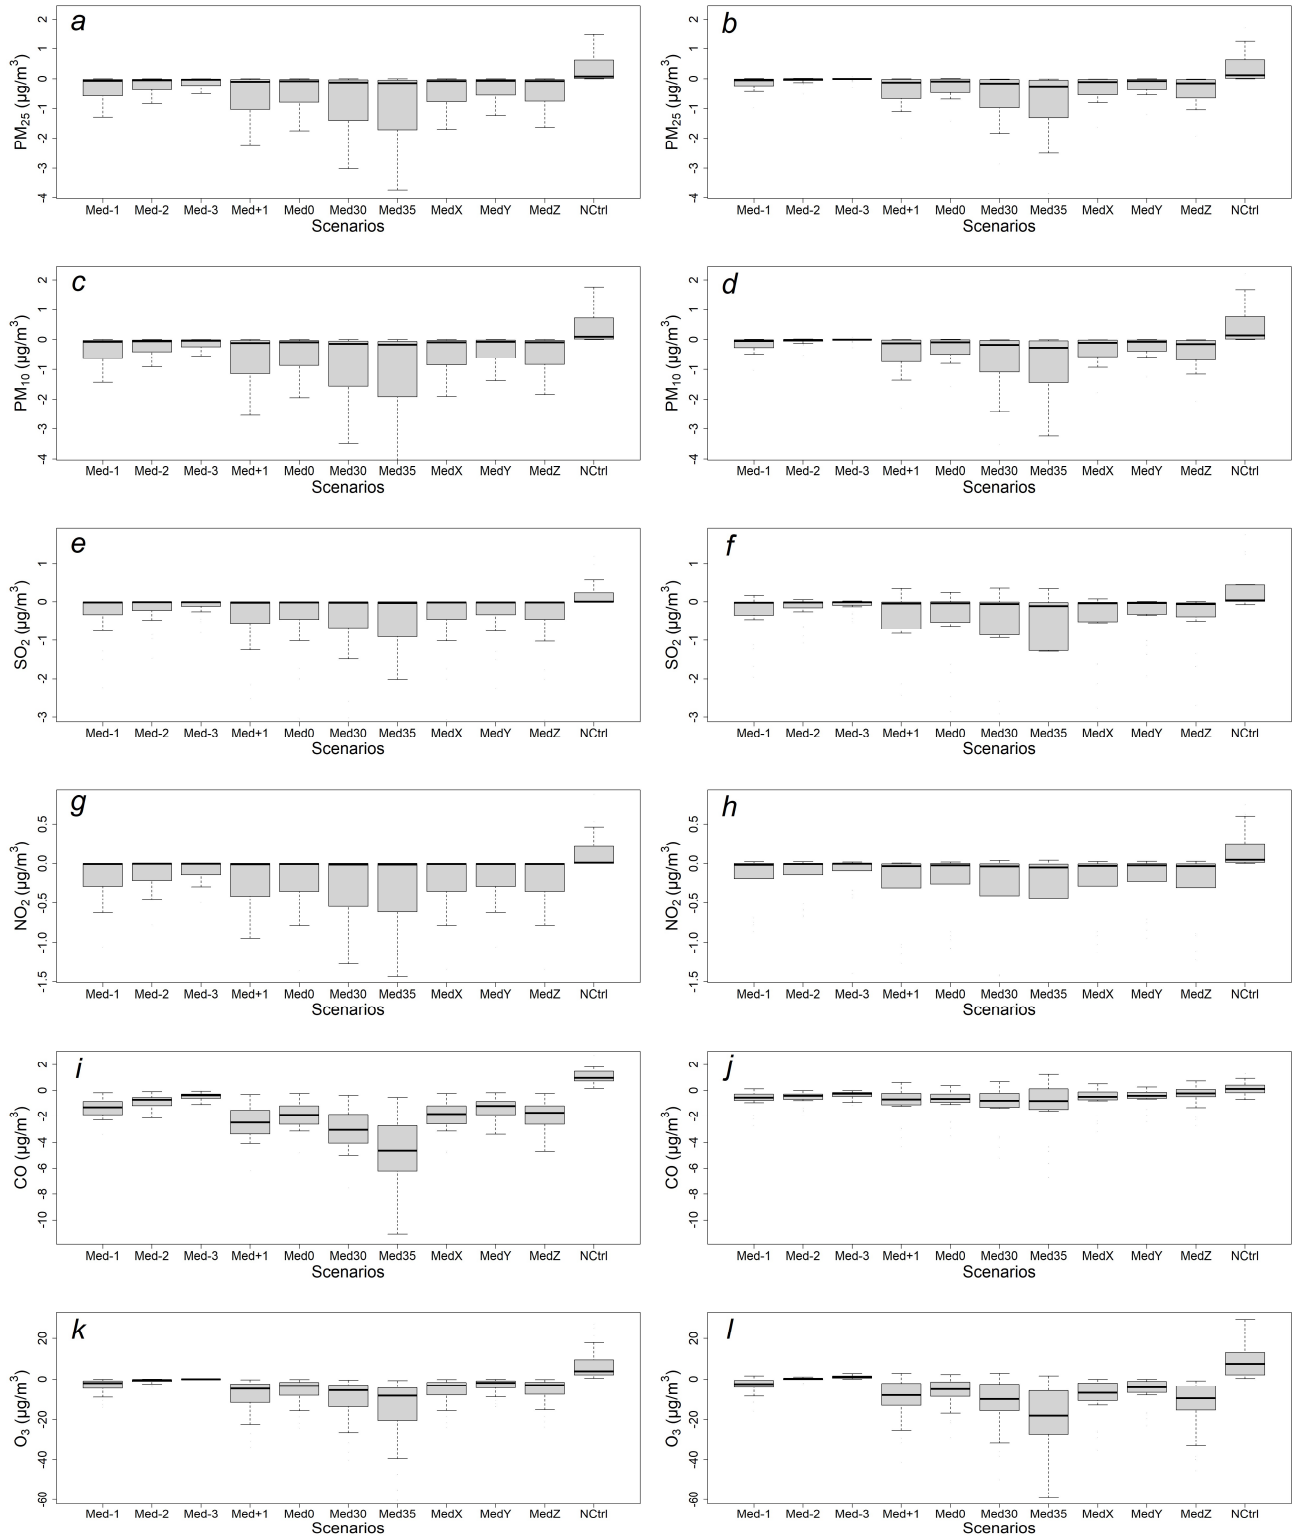

**Figure S17: Air pollutant concentration changes in terms of base case simulated by CMAQ (subplots of a, c, e, g, i, and k in the first column) and by FastCTM (subplots of b, d, f, h, j, and l in the second column) in July 2019.**
